# Supplementary material
Source: bioRxiv or medRxiv preprint supplement (https://www.medrxiv.org/highwire/filestream/72441/field_highwire_adjunct_files/0/2020.02.22.20025460-1.pdf)
Supplement: Supplementary file [file 2020.02.22.20025460-1.pdf]

## Supplemental materials

**Figure S1.** Determination of assay cut-off. (A) Representative signal curves produced by CRISPR-nCoV. A positive control (red), a negative control (black) and clinical samples (blue) were shown with distinct positive or negative curve patterns (B) Fold-change values by CRISPR-nCoV obtained from our prospective cohort. Positive, i.e. ones with take-off signal curves were in red; Negative, i.e. ones with flat curves were in blue. A cut-off of 3,0 was set and indicated in black dashed line.

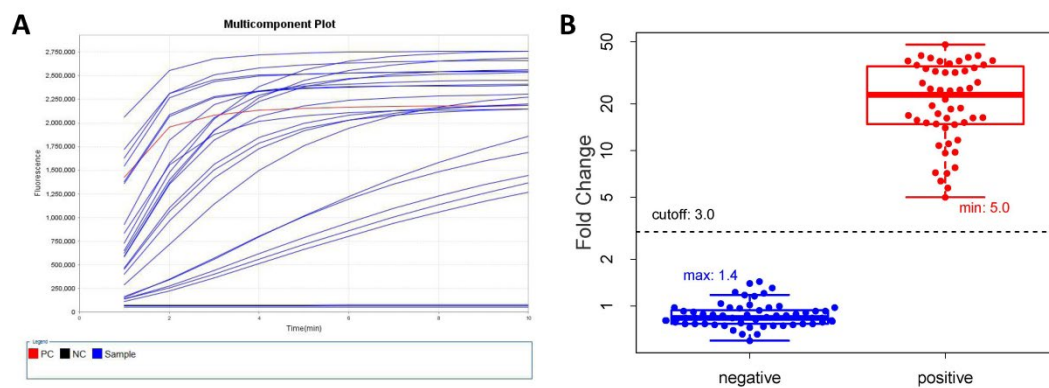

Figure S1.
